# Supplementary material for: Antimicrobial Residue Accumulation Contributes to Higher Levels of Rhodococcus equi Carrying Resistance Genes in the Environment of Horse-Breeding Farms
Source: MDPI journal article supplement (doi:10.3390/vetsci11020092), 2024-02-17
Supplement: s1 [file s1]

**Supplementary Materials:**

| Antimicrobial Standard              | CAS-No.     | Brand                 |
|-------------------------------------|-------------|-----------------------|
| 2,5-Dichlorothiophene-3-sulfonamide | 53595-68-9  | Aldrich Chemistry     |
| Ampicillin                          | 69-53-4     | Sigma-Aldrich         |
| Azithromycin                        | 117772-70-0 | European Pharmacopeia |
| Clarithromycin                      | 81103-11-9  | European Pharmacopeia |
| Cycloheximide                       | 66-81-9     | VWR Life Science      |
| Doxycycline hyclate                 | 24390-14-5  | U. S. Pharmacopeia    |
| Erythromycin                        | 114-07-8    | U. S. Pharmacopeia    |
| Tetracycline hydrochloride          | 64-75-5     | Sigma-Aldrich         |
| Tylosin                             | 1401-69-0   | Sigma-Aldrich         |

**Table S1.** List of antimicrobial standards used to create standard curves for mass spectrometry analysis. The antimicrobial concentrations used for the construction of standard curves were adjusted to the following gradient: 5 µg/mL, 1 µg/mL, 0.5 µg/mL, 0.1 µg/mL, 0.05 µg/mL, 0.01 µg/mL.
